# Supplementary material for: Lipidomic Signatures Reveal Seasonal Shifts on the Relative Abundance of High-Valued Lipids from the Brown Algae Fucus vesiculosus
Source: PubMed Central journal article supplement (PMC6627367; doi:10.3390/md17060335), 2019-06-04
Supplement: marinedrugs-17-00335-s001.pdf [file marinedrugs-17-00335-s001.pdf]

## Supplementary information

# Lipidomic signatures reveal seasonal shifts on the relative abundance of high-valued lipids from the brown algae *Fucus vesiculosus*

Elisabete da Costa <sup>1,2</sup>, Pedro Domingues <sup>1</sup>, Tânia Melo <sup>1,2</sup>, Elisabete Coelho <sup>3</sup>, Rui Pereira <sup>4</sup>, Ricardo Calado <sup>5</sup>, Maria H. Abreu <sup>4</sup>, M. Rosário Domingues <sup>1,2,\*</sup>

<sup>1</sup> Centro de Espetrometria de Massa, Departamento de Química & QOPNA & LAQV-REQUIMTE, Universidade de Aveiro, Campus Universitário de Santiago, 3810-193 Aveiro

<sup>2</sup> Departamento de Química & CESAM & ECOMARE, Universidade de Aveiro, Campus Universitário de Santiago, 3810-193 Aveiro, Portugal

<sup>3</sup> Departamento de Química & QOPNA & LAQV-REQUIMTE, Universidade de Aveiro, Campus Universitário de Santiago, 3810-193 Aveiro

<sup>4</sup> ALGApplus - Produção e comercialização de algas e seus derivados, Lda., 3830-196 Ílhavo, Portugal

<sup>5</sup> Departamento de Biologia & CESAM & ECOMARE, Universidade de Aveiro, Campus Universitário de Santiago, 3810-193 Aveiro, Portugal

\* Correspondence: mrd@ua.pt

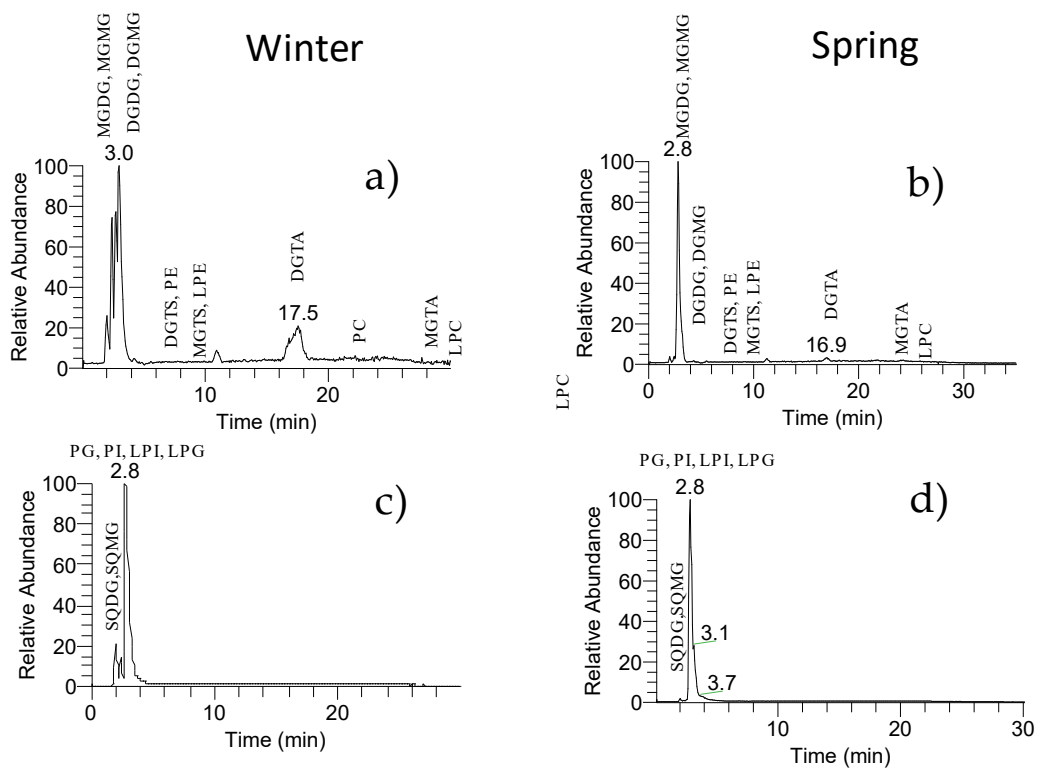

**Figure S1.** Total ion chromatograms (TIC) of lipid extracts from *Fucus vesiculosus* collected in winter and spring, respectively acquired on positive mode (a, b) and negative mode (c, d).

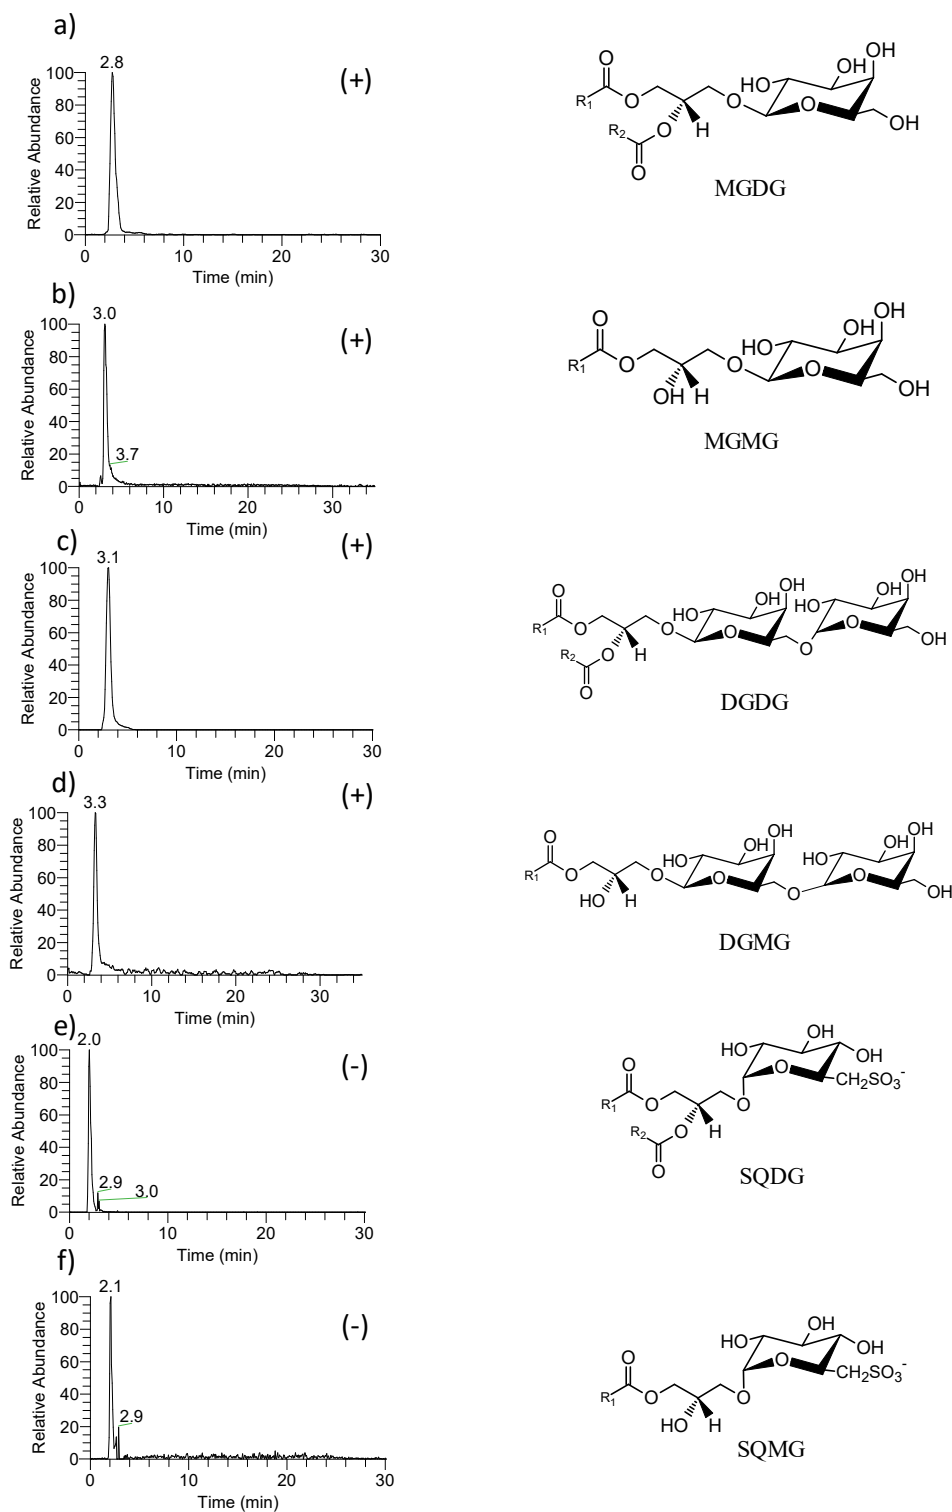

**Figure S2.** Reconstructed ion chromatograms (RIC) representative of the glycolipid classes. RIC of the  $[M + \text{NH}_4]^+$  ions of the neutral glycolipids MGDG at  $m/z$  816.5626 (a), MGMG at  $m/z$  530.3329 (b), DGDG at  $m/z$  978.6154 (c), DGMG at  $m/z$  694.4014 (d), and of the  $[M - \text{H}]^-$  ions of the acidic glycolipids SQDG at  $m/z$  819.5292 (e) and SQMG at  $m/z$  555.2839 (f).

## February batch

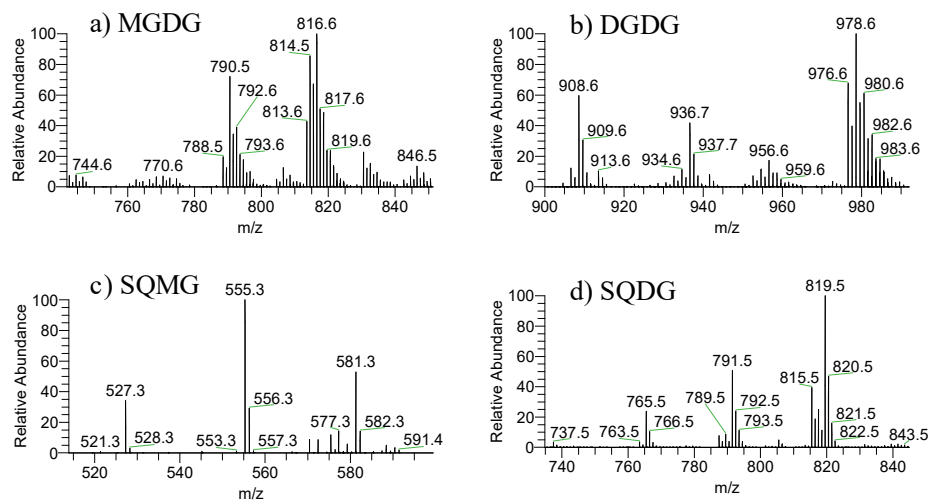

## May batch

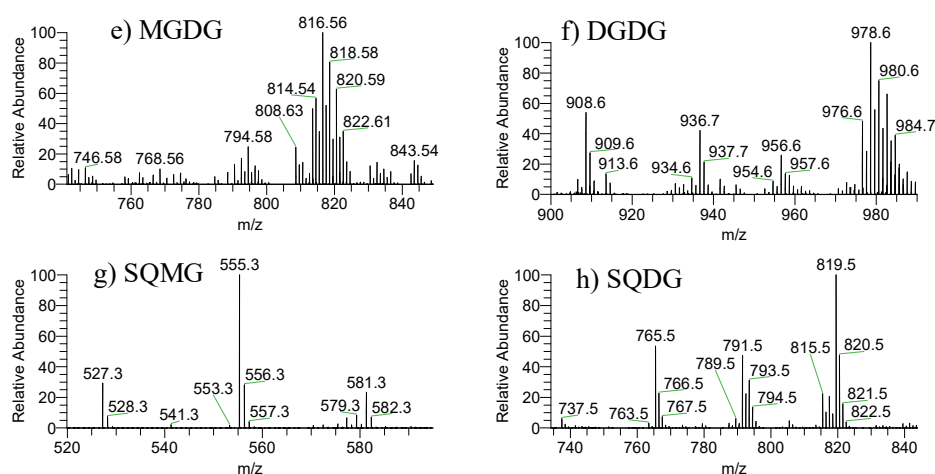

**Figure S3.** LC–MS spectra of glycolipids from *Fucus vesiculosus* collected in winter (February batch, a, b, c, d) and spring (May batch e, f, g, h). MGDG (a and e), DGDG (b and f) molecular species were identified as  $[M + NH_4]^+$  ions. SQMG (c and g) and SQDG (d and h) were identified as  $[M - H]^-$  ions. The accurate mass of  $m/z$  values with 4 decimal places are specified in table S1.

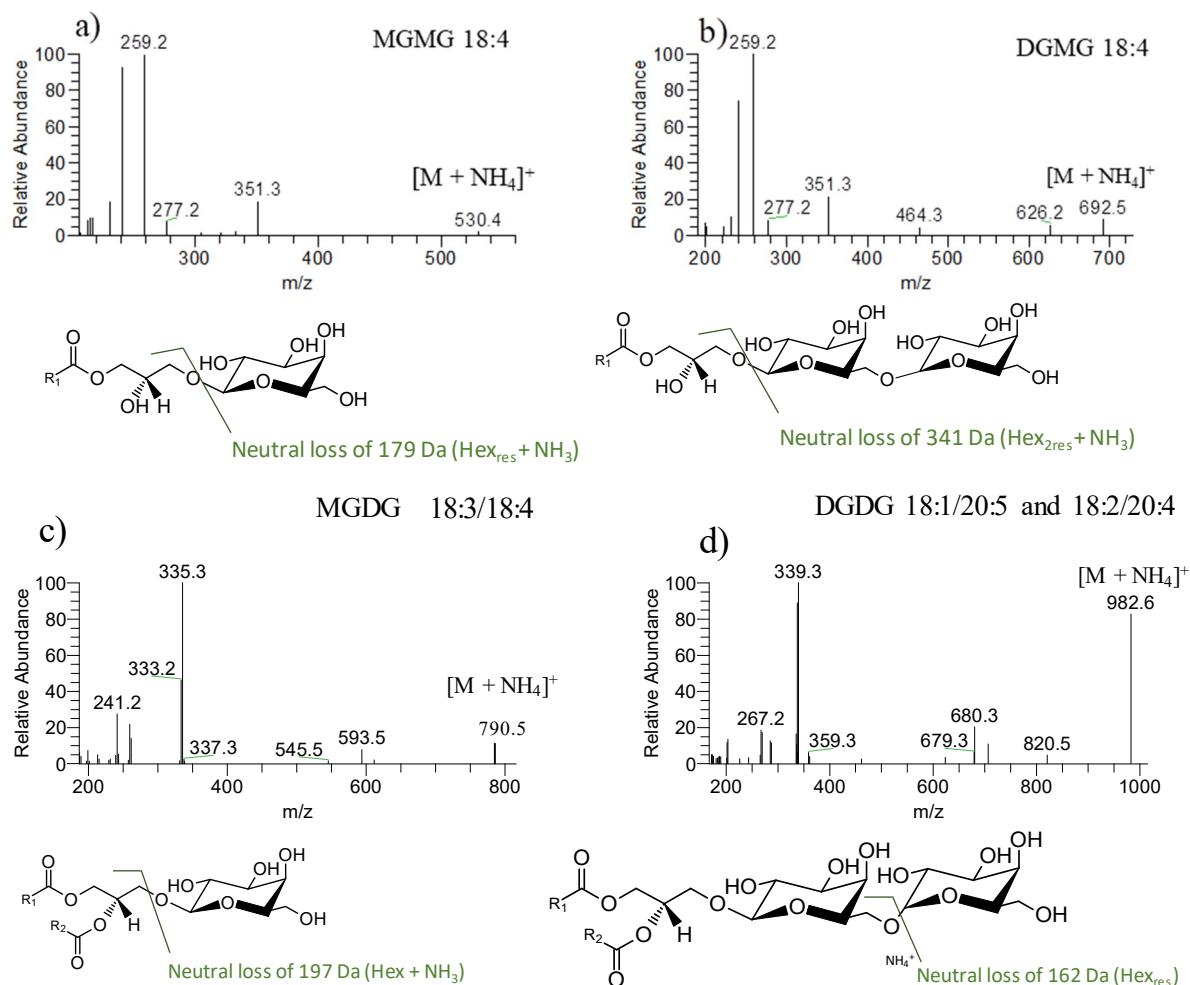

**Figure S4.** LC-MS/MS spectra of  $[M + NH_4]^+$  ions of MGMT (18:4) at  $m/z$  530.4 (a), DGMG (18:4) at  $m/z$  692.5 (b), MGDG (18:3/18:4) at  $m/z$  790.5 (c) and DGDG (18:1/20:5) - (18:2/20:4) at  $m/z$  982.6 (d). Typical fragmentation of mono galactosyl glycolipids observed in the MS/MS spectra of the MGMT (a) is neutral loss of  $NH_3$  plus loss of galactosyl residue (-179 Da) with formation of the ion at  $m/z$  351.3, and in the case of MGDG (c) is the neutral loss of  $NH_3$  plus loss of galactosyl unit (-197 Da) with formation of the ion at  $m/z$  593.5. Typical fragmentation of digalactosyl glycolipids observed in the MS/MS spectra of the DGMG (b) is the neutral loss of  $NH_3$  plus digalactosyl residue that correspond to the loss of 341 Da  $[M + H - 341]^+$ , herein seen as ion at  $m/z$  351.3. In the case of DGDG (d) the typical neutral loss arise from (-162 Da) of the galactosyl residue herein seen as ion  $[M + NH_4 - 162]^+$  at  $m/z$  820.5 seen as ion. These fragmentation pathways allow to identify the polar head group. The typical product ions that allow to identify the fatty acyl composition are the acylium ion  $[RCO]^+$  observed in the MS/MS spectra of the lyso glycolipids MGMT and DGMG, and the product ions  $[RCO + 74]^+$  observed in the MS/MS spectra of the glycolipids MGDG and DGDG. In the MS/MS spectra of MGMT and DGMG the product ions  $[RCO]^+$  are seen at  $m/z$  259.3 (18:4 FA). In MS/MS spectrum of MGDG (c) the product ion  $[RCO + 74]^+$  is seen at  $m/z$  333.2 (18:4 FA) and at  $m/z$  335.3 (18:3 FA) while in the MS/MS spectrum of DGDG the product ion  $[RCO + 74]^+$  is seen at  $m/z$  339.2 (18:1 FA) and at  $m/z$  359.3 (20:5 FA) (d) [1-6].

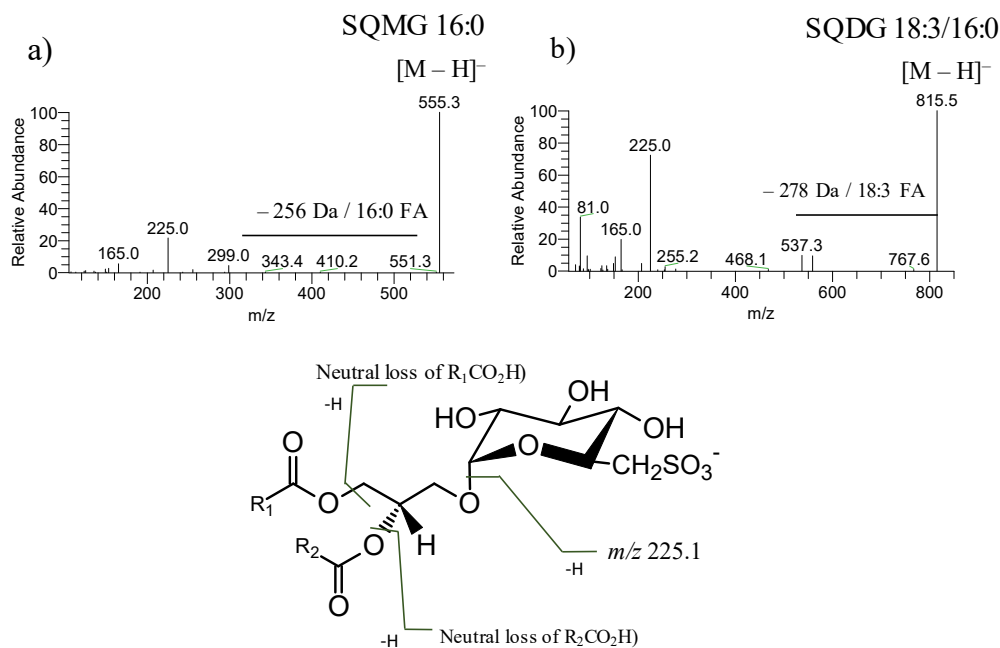

**Figure S5.** LC-MS/MS spectra of  $[M - H]^-$  ions of SQMG (16:0) at  $m/z$  555.3 (a), and SQDG (18:3/16:0) at  $m/z$  815.5 (b). The diagnostic ions of both sulfolipid classes is the product ion at  $m/z$  225.0, that correspond to polar head group sulfoquinovosyl anion  $C_6H_9O_7S^-$  and the ion at  $m/z$  81 assigned as  $SO_3^-$ . Product ions that allow to confirm fatty acyl composition are the product ion corresponding to neutral loss of fatty acyl group as free carboxylic ( $-RCOOH$ ) identified at  $m/z$  299.0 ( $-256$  Da, 16:0 FA) in the MS/MS spectrum of SQMG (a) and identified at  $m/z$  537.3 ( $-278$  Da, 18:3 FA) and at 559.3 ( $-256$  Da, 16:0 FA) in the MS/MS spectra of SQDG (b). Typical abundant  $R_2COO^-$  product seen at  $m/z$  255.2 corresponds to 16:0 FA [1-6].

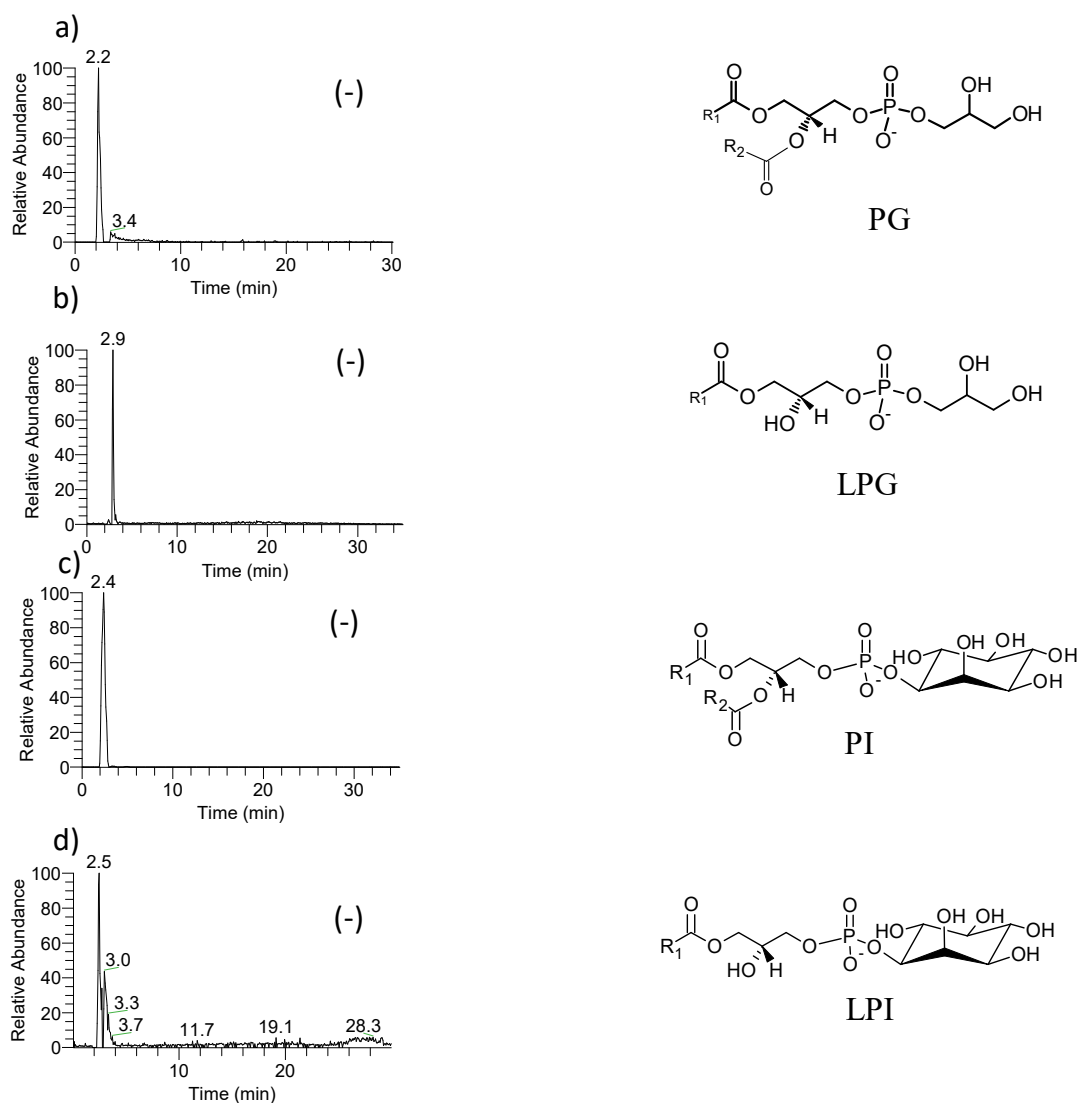

**Figure S6.** Reconstructed ion chromatograms (RIC) representative of the anionic phospholipid classes PG, LPG, PI and LPI classes: RIC of the  $[M - H]^-$  ions of the PG at  $m/z$  741.4707 (a), LPG at  $m/z$  481.2566 (b), PI at  $m/z$  835.5337 (c) and LPI at  $m/z$  597.3040 (d).

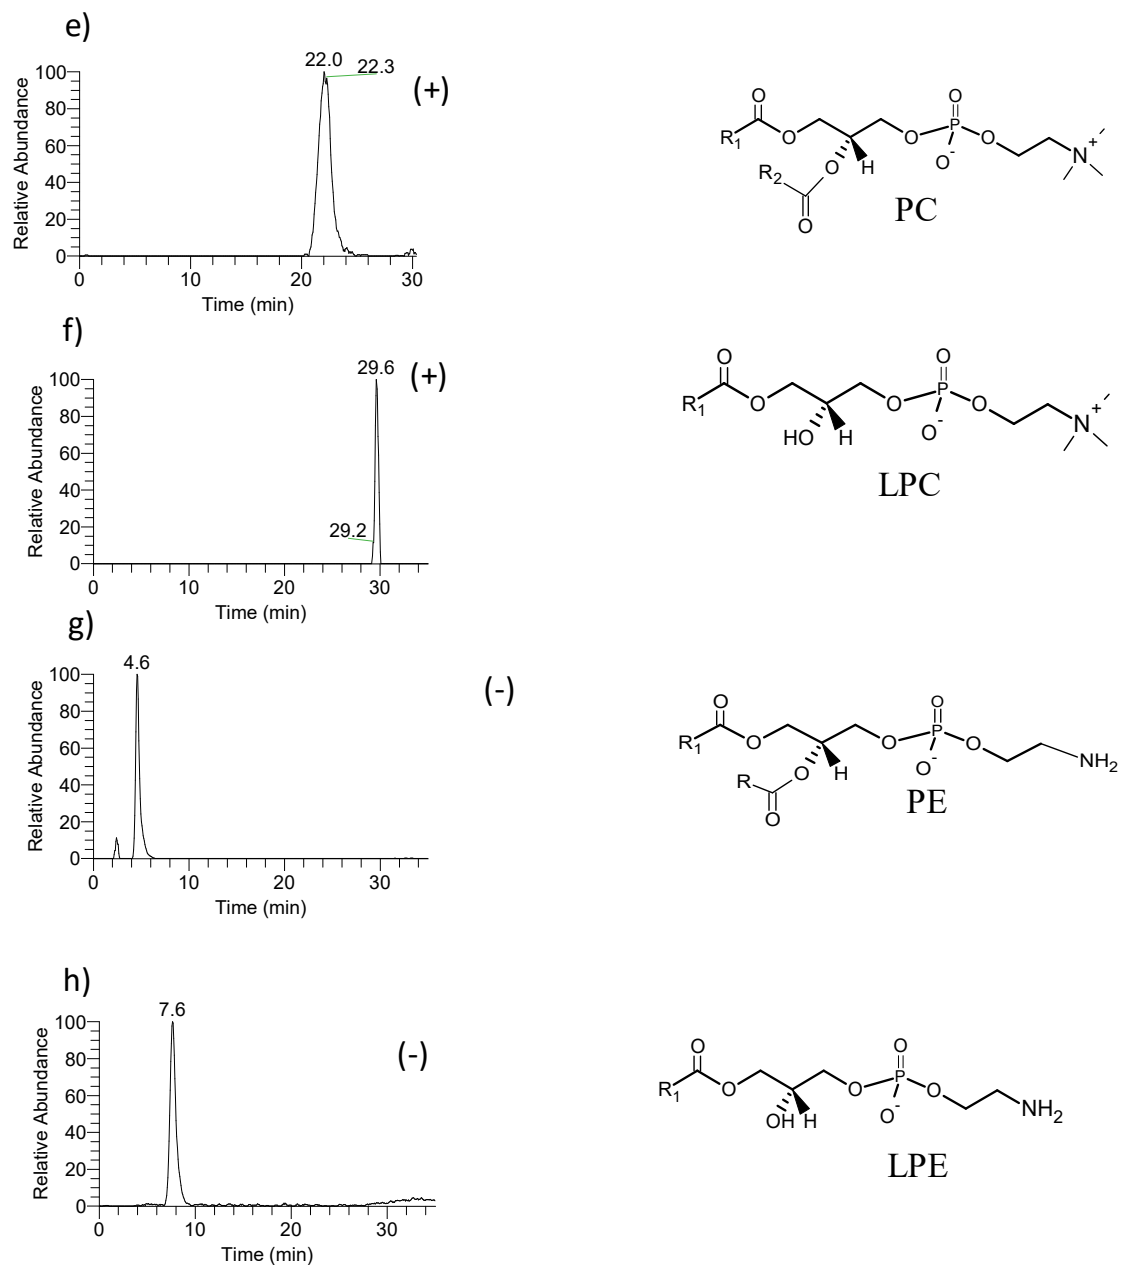

**Figure S7.** Reconstructed ion chromatograms (RIC) representative of the phospholipid classes PC, LPC, PE and LPE: RIC of the  $[M + H]^+$  ions of PC at  $m/z$  784.5856 (e), LPC at  $m/z$  496.3403 (f) and of the  $[M - H]^-$  ions of the PE at  $m/z$  786.5074 (g) and LPE at  $m/z$  500.2777 (h).



February batch

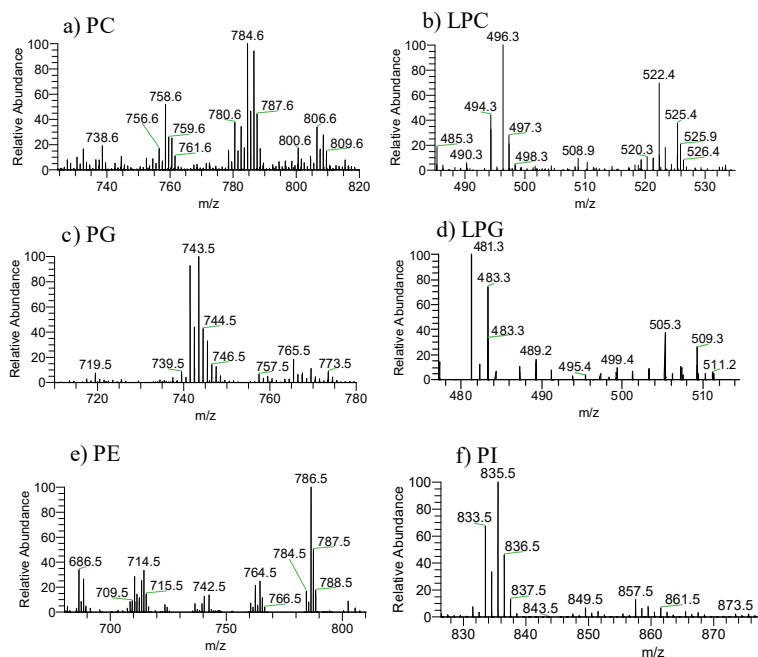

May batch

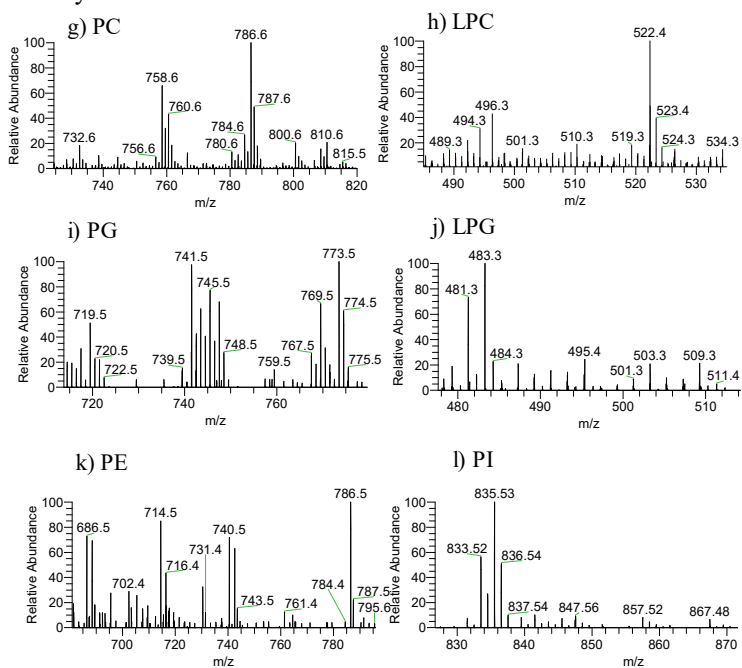

**Figure S8.** LC–MS spectra of phospholipids from *Fucus vesiculosus* collected in winter (February batch a, b, c, d, e, f) and spring (May batch g, h, I, j, k, l). PC (a and g), LPC (b and h) were identified as  $[M + H]^+$  ions; PG (c and i), LPG (d and j), PE (e and k), and PI (f and l) were identified as  $[M - H]^-$  ions. The accurate mass of  $m/z$  values with 4 decimal places are specified in table S1.

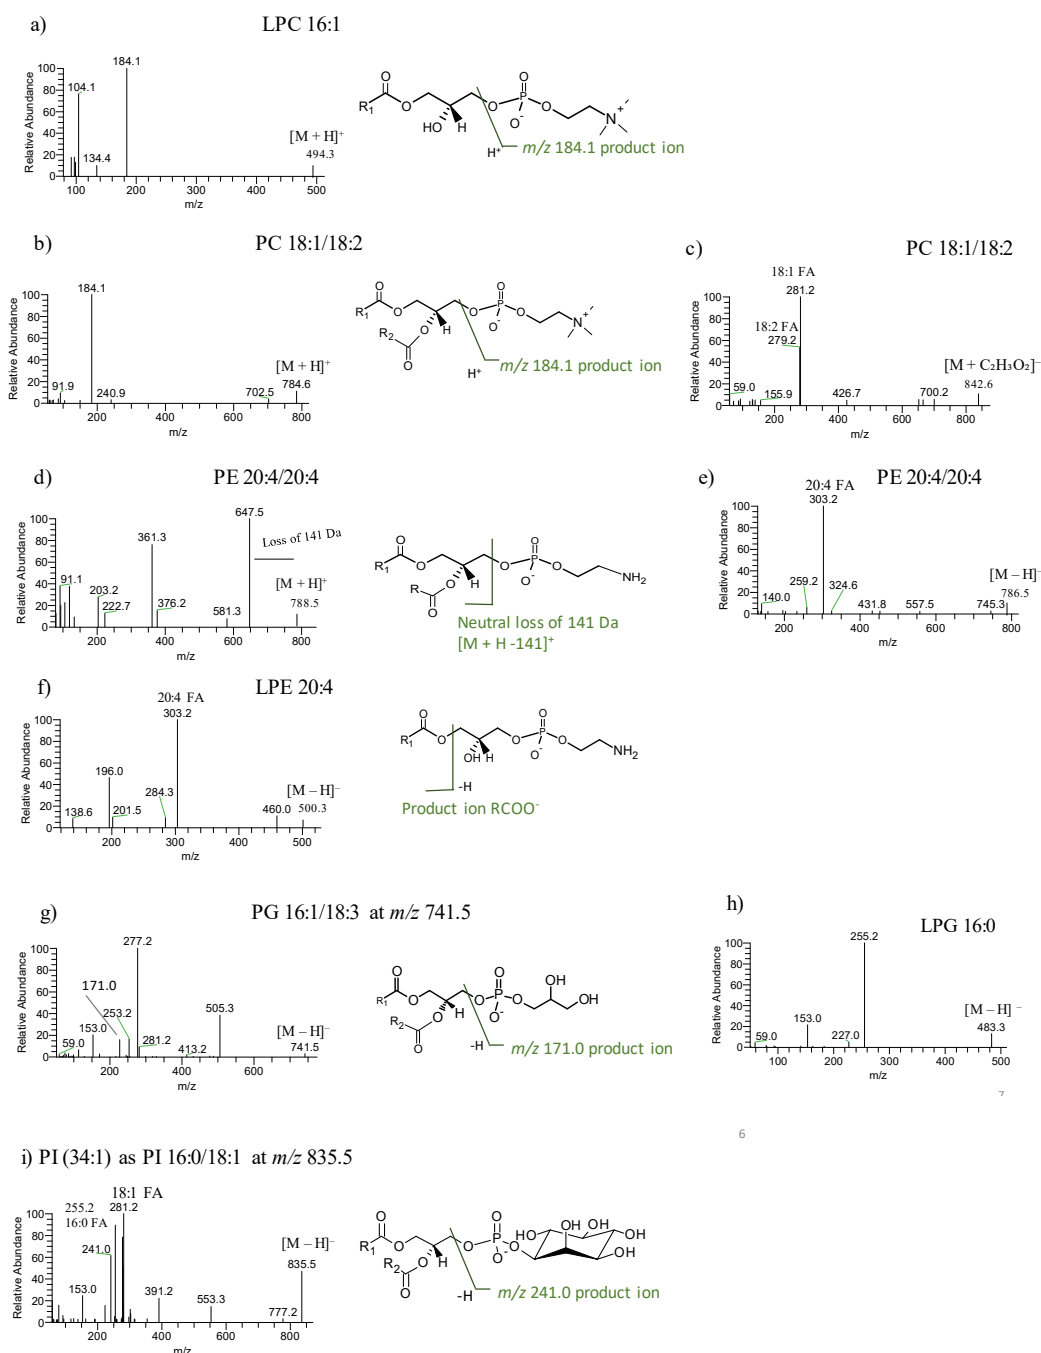

**Figure S9.** MS/MS spectra of LPC 16:1 at  $m/z$  494.3 as  $[M + H]^+$  (a), PC 18:1/18:2 as  $[M + H]^+$  at  $m/z$  784.6 (b) and as  $[M + CH_3OO]^-$  at  $m/z$  842.6 (c), PE 20:4/20:4 at  $m/z$  788.5 as  $[M + H]^+$  (d) and at  $m/z$  786.5 as  $[M - H]^-$  (e), LPE 20:4 at  $m/z$  500.3 as  $[M - H]^-$  (f), PG 16:1/18:3 at  $m/z$  741.5 as  $[M - H]^-$  (g), LPG 16:0 at  $m/z$  483.3 as  $[M - H]^-$  (h), and PI 16:0/18:1 at  $m/z$  835.5 as  $[M - H]^-$  (i). (a) and (b) LPC and PC class are characterized by the abundant product ion formed in positive mode at  $m/z$  184.1 that is PC diagnostic ion phosphocholine  $C_5H_{15}NO_4P^+$ . (c) Fatty acyl groups are assigned by abundant carboxylate anions  $R_1COO^-$  and  $R_2COO^-$  observed in the MS/MS spectra of  $[M + CH_3OO]^-$  as seen herein at  $m/z$  279.2 (18:2 FA) and 281.2 (18:1 FA). (e)

and (f) PE and LPE classes fatty acyl composition is identified in the MS/MS spectra of the  $[M - H]^-$  ion by the presence of abundant carboxylate anions  $R_1COO^-$  seen in this case at  $m/z$  303.2 (20:4 FA). In the positive mode (d) the PE class is confirmed by the abundant product ion formed by neutral loss of 141 Da due to loss of polar head ( $m/z$  647.5). (g) PG fatty acyl composition was assigned by  $R_1COO^-$  and  $R_2COO^-$  ( $m/z$  253.2 – 16:1 FA and 277.2 – 18:3 FA) and ions corresponding to neutral loss of ketene  $[M - H - RCHC=C=O]^-$  at  $m/z$  505 (-236 Da, ketene form of 16:1 FA). Additionally, ion at  $m/z$  413.2 arise to loss of fatty acyl group as free carboxylic acid (-278 Da – 18:3 FA) along with polar head group (-135 Da,  $C_4H_5O_4P^-$ ) as well as  $m/z$  ion 171 (glycerol phosphate). (h) LPG fatty acyl composition was assigned by abundant product ion  $RCOO^-$  ( $m/z$  255.2). (i) PI class was characterized by diagnostic product ion at  $m/z$  241.0 identified as cyclic anion of inositol phosphate. Abundant  $R_1COO^-$  and  $R_2COO^-$  (16:0 FA as  $m/z$  255.2 and 18:1 FA as 281.2 ions) and ions corresponding to neutral loss of each fatty acyl group as free carboxylic acid  $[M - H - RCOOH]^-$  at  $m/z$  553.3 (neutral loss of 282 Da represents 18:1 FA) are also seen [1-6].

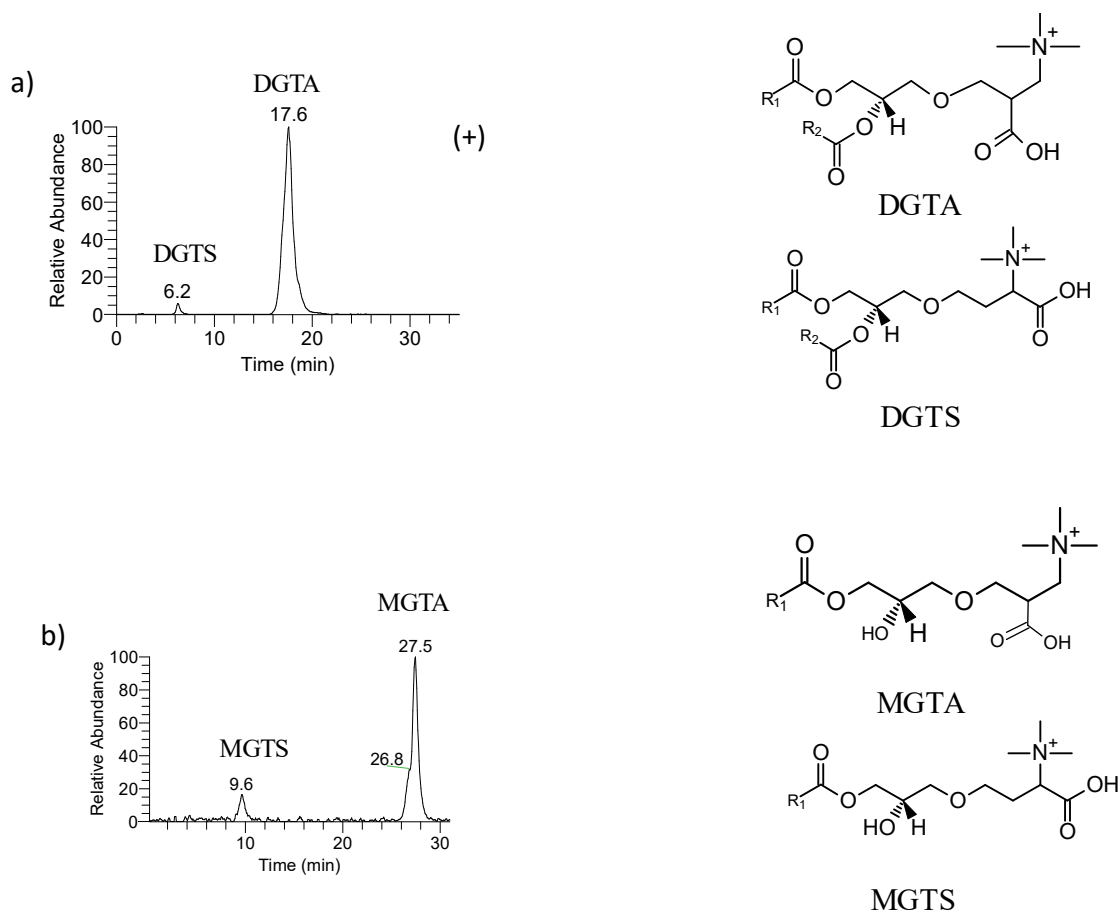

**Figure S10.** Reconstructed ion chromatograms representative of the betaine lipids: RIC of the  $[M + H]^+$  ions of the DGTS and DGTA at  $m/z$  708.5778 (a) and of the MGTS and MGTA at  $m/z$  498.3795 (b).

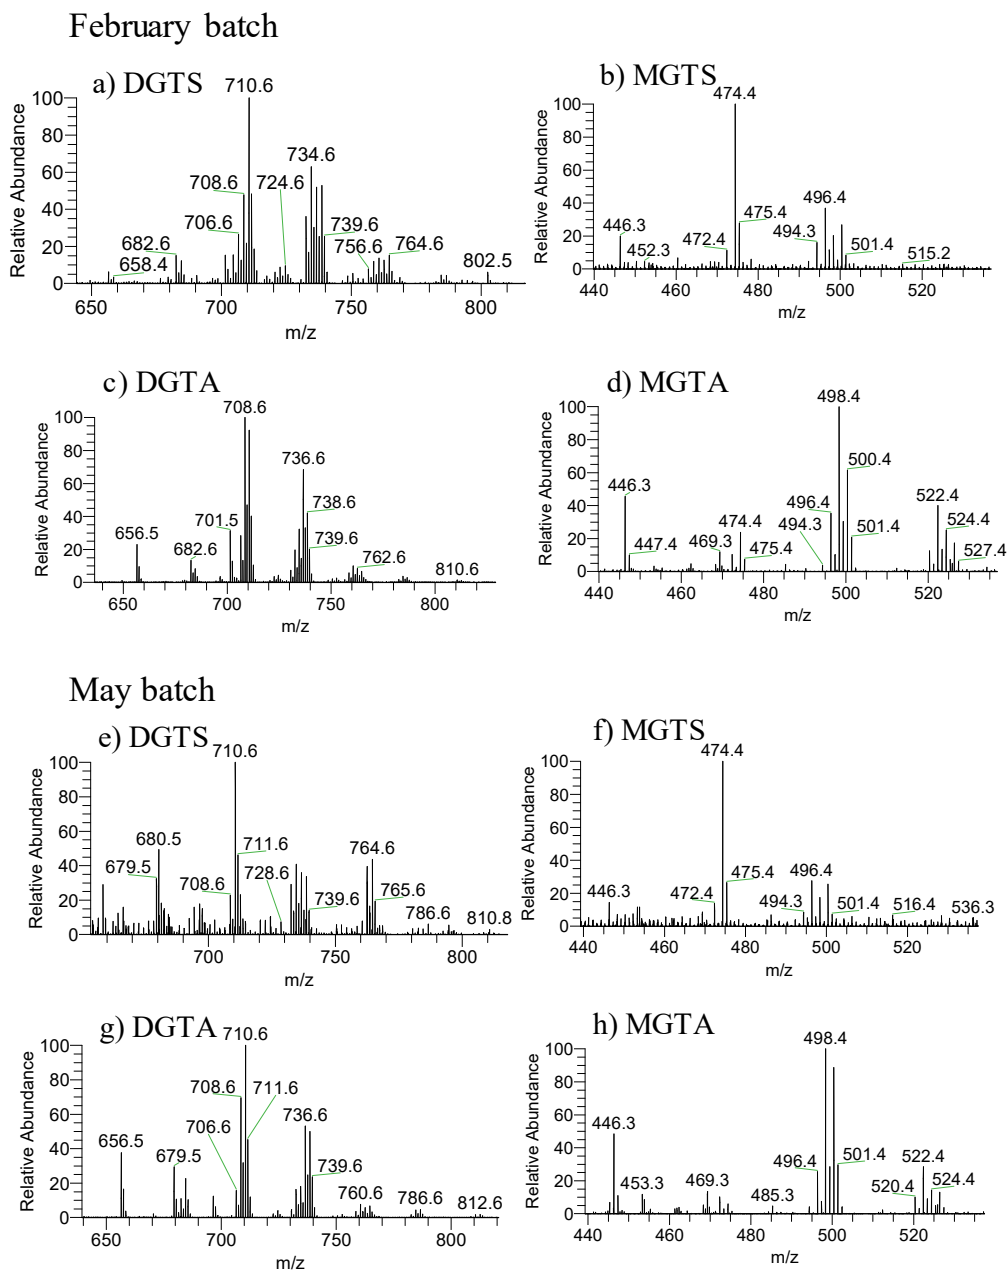

**Figure S11.** LC-MS spectra of betaine lipids from *Fucus vesiculosus* collected in winter (February batch a, b, c, d) and spring (May batch e, f, g, h). DGTS (a and e), MGTS (b and f), DGTA (c and g), MGTA (e and h) were identified as  $[M + H]^+$  ions. The accurate mass of  $m/z$  values with 4 decimal places are specified in table S1.

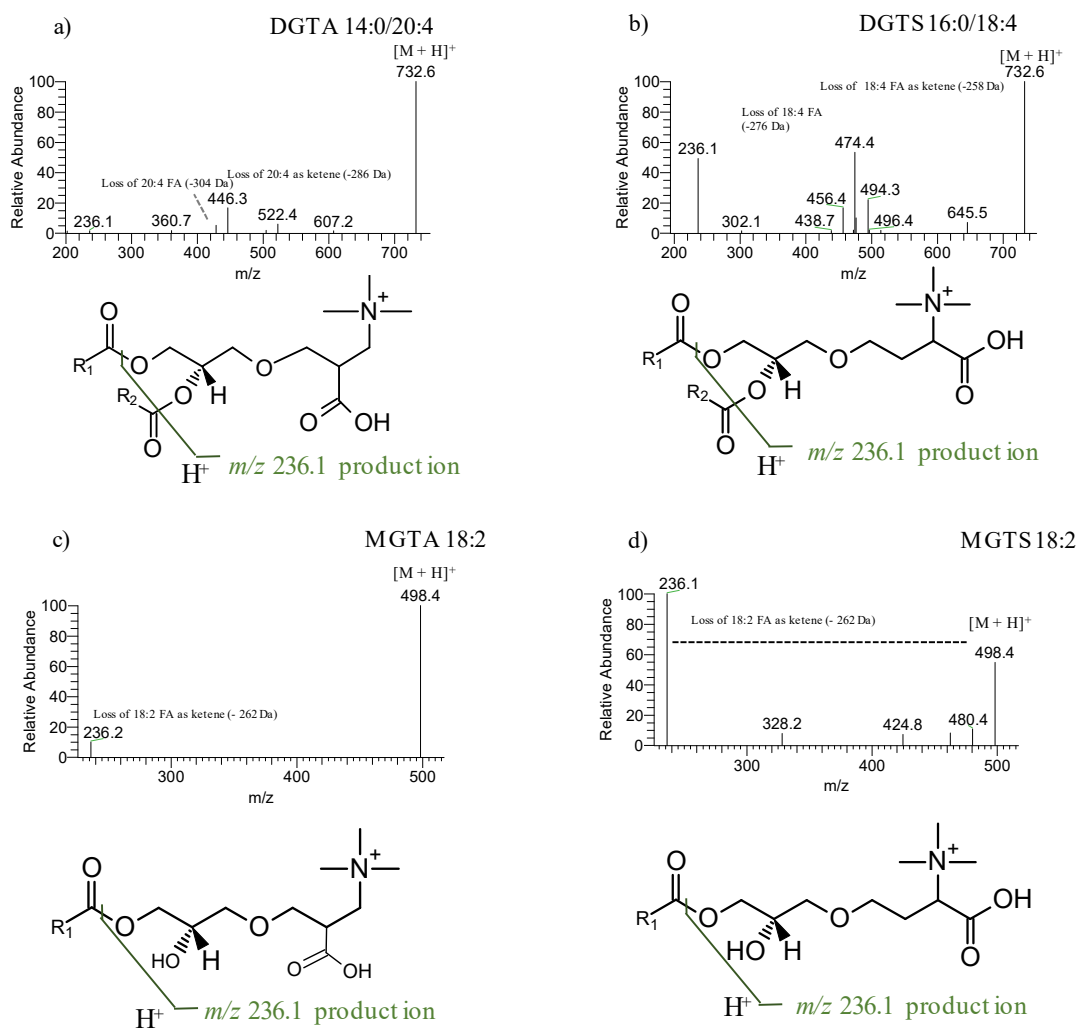

**Figure S12.** MS/MS spectra of DGTA (34:4) at  $m/z$  732.6 (a), DGTS (34:4) at  $m/z$  732.6 (b), MGTA (34:4) at (18:2) at  $m/z$  498.46 (c) and MGTS (18:2) at  $m/z$  498.46 (d). The product ions resultant from neutral loss of either  $R_{1,2}COOH$  free carboxylic acids and ketene  $R_{1,2}CH=C=O$  that are indicative of the respective fatty acyl composition of the molecular species. The characteristic ion at  $m/z$  236.150 arises from polar head is the diagnostic ion of these classes [2-6].

Annotations of tandem mass spectrometry were based on literature:

1. Murphy, R.C. Tandem mass spectrometry of lipids. New developments in Mass spectrometry No.4. ISBN 978-11-84973-827-9. Royal Society of Chemistry, **2015**.
2. Melo, T.; Alves, E.; Azevedo, V.; Martins, A. S.; Neves, B.; Domingues, P.; Calado, R.; Abreu, M. H.; Domingues, M. R. Lipidomics as a new approach for the bioprospecting of marine macroalgae – Unraveling the polar lipid and fatty acid composition of *Chondrus crispus*. *Algal Res.* **2015**, *8*, 181–191.
3. da Costa, E.; Melo, T.; Moreira, A. S. P. A. S. P.; Alves, E.; Domingues, P.; Calado, R.; Abreu, M. H. M.; Domingues, M. R. Decoding bioactive polar lipid profile of the macroalgae *Codium tomentosum* from a sustainable IMTA system using a lipidomic approach. *Algal Res. Submitt.* **2015**, *12*, 388–397.
4. Da Costa, E.; Melo, T.; Moreira, A. S. P. A.; Bernardo, C.; Helguero, L.; Ferreira, I.; Cruz, M. T. M.; Rego,

- A. M. A.; Domingues, P.; Calado, R.; Abreu, M. M. H.; Domingues, M. Valorization of lipids from *Gracilaria* sp. through lipidomics and decoding of antiproliferative and anti-inflammatory Activity. *Mar. Drugs* **2017**, *15*, 62.
5. da Costa, E.; Azevedo, V.; Melo, T.; Rego, A. M.; Evtuguin, D. V.; Domingues, P.; Calado, R.; Pereira, R.; Abreu, M. H.; Domingues, M. R. High-resolution lipidomics of the early life stages of the red seaweed *Porphyra dioica*. *Molecules* **2018**, *23*.
6. Lopes, D.; Moreira, A. S. P.; Rey, F.; da Costa, E.; Melo, T.; Maciel, E.; Rego, A.; Abreu, M. H.; Domingues, P.; Calado, R.; Lillebø, A. I.; Rosário Domingues, M. Lipidomic signature of the green macroalgae *Ulva rigida* farmed in a sustainable integrated multi-trophic aquaculture. *J. Appl. Phycol.* **2018**, *2*, 1369-1381

**Table S1.** Molecular species observed by HILIC–MS, with the assignment of the total fatty acyl composition of each lipid molecular species. Analyses were determined by mass accuracy (error  $\leq 5$  ppm) using the MZ mine 2 and Xcalibur software, exact mass calculator <http://www.sisweb.com/referenc/tools/exactmass.htm>, and lipid maps tools <http://www.lipidmaps.org/tools/> and home database for glycolipids and betaine lipids (Mass spectrometry Center of Aveiro)

| <b>Formula</b> | <b>Lipid species (C:N)</b> | <b>Calculated <i>m/z</i></b> | <b>Observed <i>m/z</i></b> | <b>Delta ppm</b> |
|----------------|----------------------------|------------------------------|----------------------------|------------------|
| C41H80NO10     | MGDG (32:1)                | 746.5777                     | 746.5765                   | -1.6073          |
| C43H78NO10     | MGDG (34:4)                | 768.5620                     | 768.5621                   | 0.1301           |
| C43H80NO10     | MGDG (34:3)                | 770.5782                     | 770.5764                   | -2.3671          |
| C43H82NO10     | MGDG (34:2)                | 772.5933                     | 772.5935                   | 0.2589           |
| C43H84NO10     | MGDG (34:1)                | 774.6090                     | 774.6074                   | -2.0656          |
| C45H74NO10     | MGDG (36:8)                | 788.5313                     | 788.5307                   | -0.7229          |
| C45H76NO10     | MGDG (36:7)                | 790.5469                     | 790.5459                   | -1.2649          |
| C45H78NO10     | MGDG (36:6)                | 792.5625                     | 792.5614                   | -1.3879          |
| C45H80NO10     | MGDG (36:5)                | 794.5782                     | 794.5772                   | -1.2585          |
| C45H82NO10     | MGDG (36:4)                | 796.5933                     | 796.5929                   | -0.5021          |
| C47H76NO10     | MGDG (38:9)                | 814.5469                     | 814.5449                   | -2.4848          |
| C47H78NO10     | MGDG (38:8)                | 816.5626                     | 816.5608                   | -2.1676          |
| C47H80NO10     | MGDG (38:7)                | 818.5782                     | 818.5766                   | -1.9839          |
| C47H82NO10     | MGDG (38:6)                | 820.5939                     | 820.5926                   | -1.5842          |
| C47H84NO10     | MGDG (38:5)                | 822.6095                     | 822.6073                   | -2.6987          |
| C47H86NO10     | MGDG (38:4)                | 824.6251                     | 824.6235                   | -1.9403          |
| C49H80NO10     | MGDG (40:9)                | 842.5782                     | 842.5751                   | -3.6978          |
| C49H82NO10     | MGDG (40:8)                | 844.5939                     | 844.5940                   | 0.0983           |
| C27H48NO9      | MGMG (18:4)                | 530.3329                     | 530.3327                   | -0.3941          |
| C27H50NO9      | MGMG (18:3)                | 532.3486                     | 532.3488                   | 0.4527           |
| C27H52NO9      | MGMG (18:2)                | 534.3642                     | 534.3646                   | 0.7317           |
| C27H54NO9      | MGMG (18:1)                | 536.3799                     | 536.3795                   | -0.6693          |
| C47H88O15N     | DGDG (32:2)                | 906.6154                     | 906.6148                   | -0.6607          |
| C47H90O15N     | DGDG (32:1)                | 908.6310                     | 908.6305                   | -0.6042          |
| C49H88O15N     | DGDG (34:4)                | 930.6154                     | 930.6135                   | -2.0406          |
| C49H90O15N     | DGDG (34:3)                | 932.6310                     | 932.6305                   | -0.5887          |
| C49H92O15N     | DGDG (34:2)                | 934.6467                     | 934.6461                   | -0.6409          |
| C49H94O15N     | DGDG (34:1)                | 936.6623                     | 936.6618                   | -0.5861          |
| C49H96O15N     | DGDG (34:0)                | 938.6780                     | 938.6780                   | 0.0011           |
| C51H86O15N     | DGDG (36:7)                | 952.5997                     | 952.5992                   | -0.5763          |

|            |             |          |          |         |
|------------|-------------|----------|----------|---------|
| C51H88O15N | DGDG (36:6) | 954.6154 | 954.6148 | -0.6275 |
| C51H90O15N | DGDG (36:5) | 956.6310 | 956.6305 | -0.5739 |
| C51H92O15N | DGDG (36:4) | 958.6467 | 958.6461 | -0.6248 |
| C51H94O15N | DGDG (36:3) | 960.6623 | 960.6623 | -0.0510 |
| C51H96O15N | DGDG (36:2) | 962.6780 | 962.6780 | 0.0010  |
| C51H98O15N | DGDG (36:1) | 964.6936 | 964.6936 | -0.0508 |
| C53H86O15N | DGDG (38:9) | 976.5997 | 976.5997 | -0.0502 |
| C53H88O15N | DGDG (38:8) | 978.6154 | 978.6144 | -1.0208 |
| C53H90O15N | DGDG (38:7) | 980.6310 | 980.6289 | -2.1914 |
| C53H92O15N | DGDG (38:6) | 982.6467 | 982.6448 | -1.9325 |
| C53H94O15N | DGDG (38:5) | 984.6623 | 984.6594 | -2.9949 |
| C53H96O15N | DGDG (38:4) | 986.6780 | 986.6767 | -1.3165 |
|            |             |          |          |         |
| C31H62NO14 | DGMG (16:0) | 672.4170 | 672.4167 | -0.4908 |
| C33H58NO14 | DGMG (18:4) | 692.3857 | 692.3856 | -0.1935 |
| C33H60NO14 | DGMG (18:3) | 694.4014 | 694.4011 | -0.4090 |
| C33H62NO14 | DGMG (18:2) | 696.4170 | 696.4159 | -1.6283 |
| C33H64NO14 | DGMG (18:1) | 698.4327 | 698.4321 | -0.8362 |
|            |             |          |          |         |
| C37H69O12S | SQDG (28:0) | 737.4510 | 737.4495 | -2.0028 |
| C39H71O12S | SQDG (30:1) | 763.4666 | 763.4648 | -2.3930 |
| C39H73O12S | SQDG (30:0) | 765.4823 | 765.4804 | -2.4520 |
| C41H71O12S | SQDG (32:3) | 787.4666 | 787.4646 | -2.5741 |
| C41H73O12S | SQDG (32:2) | 789.4823 | 789.4804 | -2.3775 |
| C41H75O12S | SQDG (32:1) | 791.4979 | 791.4958 | -2.6873 |
| C41H77O12S | SQDG (32:0) | 793.5136 | 793.5099 | -4.6326 |
| C43H73O12S | SQDG (34:4) | 813.4823 | 813.4803 | -2.4303 |
| C43H75O12S | SQDG (34:3) | 815.4979 | 815.4958 | -2.6082 |
| C43H77O12S | SQDG (34:2) | 817.5136 | 817.5107 | -3.5180 |
| C43H79O12S | SQDG (34:1) | 819.5292 | 819.5269 | -2.8394 |
| C45H75O12S | SQDG (36:5) | 839.4979 | 839.4977 | -0.2704 |
| C45H77O12S | SQDG (36:4) | 841.5136 | 841.5106 | -3.5365 |
|            |             |          |          |         |
| C23H43O11S | SQMG (14:0) | 527.2526 | 527.2515 | -2.1090 |
| C25H45O11S | SQMG (16:1) | 553.2683 | 553.2664 | -3.3655 |
| C25H47O11S | SQMG (16:0) | 555.2839 | 555.2829 | -1.8225 |
| C27H45O11S | SQMG (18:3) | 577.2683 | 577.2673 | -1.6665 |
| C27H47O11S | SQMG (18:2) | 579.2839 | 579.2832 | -1.2291 |
| C27H49O11S | SQMG (18:1) | 581.2996 | 581.2984 | -1.9972 |
|            |             |          |          |         |
| C38H71NO8P | PC (32:2)   | 730.5350 | 730.5380 | -4.0878 |
| C42H79NO8P | PC (34:3)   | 756.5536 | 756.5550 | -1.8591 |



|            |            |          |          |         |
|------------|------------|----------|----------|---------|
| C42H81NO8P | PC (34:2)  | 758.5700 | 758.5689 | -1.4264 |
| C42H83NO8P | PC (34:1)  | 760.5856 | 760.5835 | -2.8031 |
| C44H79NO8P | PC (36:5)  | 780.5543 | 780.5530 | -1.7052 |
| C44H83NO8P | PC (36:3)  | 784.5856 | 784.5850 | -0.8055 |
| C44H85NO8P | PC (36:2)  | 786.6013 | 786.6005 | -0.9942 |
| C46H79NO8P | PC (38:7)  | 804.5533 | 804.5545 | -1.4920 |
| C46H81NO8P | PC (38:6)  | 806.5700 | 806.5683 | -2.0854 |
| C46H83NO8P | PC (38:5)  | 808.5856 | 808.5831 | -3.1314 |
| C24H51NO7P | LPC (16:0) | 496.3403 | 496.3392 | -2.2485 |
| C24H49NO7P | LPC (16:1) | 494.3247 | 494.3241 | -1.1470 |
| C26H53NO7P | LPC (18:1) | 522.3560 | 522.3556 | -0.7026 |
| C38H70O10P | PG (32:2)  | 717.4707 | 717.471  | 0.4181  |
| C38H72O10P | PG (32:1)  | 719.4863 | 719.4868 | 0.6949  |
| C38H74O10P | PG (32:0)  | 721.5020 | 721.5033 | 1.8018  |
| C40H70O10P | PG (34:4)  | 741.4707 | 741.4713 | 0.8092  |
| C40H72O10P | PG (34:3)  | 743.4863 | 743.4862 | -0.1345 |
| C40H74O10P | PG (34:2)  | 745.5020 | 745.5018 | -0.2683 |
| C40H76O10P | PG (34:1)  | 747.5176 | 747.5183 | 0.9364  |
| C40H78O10P | PG (34:0)  | 749.5333 | 749.5324 | -1.2007 |
| C42H74O10P | PG (36:4)  | 769.5020 | 769.4987 | -4.2885 |
| C42H76O10P | PG (36:3)  | 771.5176 | 771.5160 | -2.0738 |
| C42H78O10P | PG (36:2)  | 773.5333 | 773.5321 | -1.5513 |
| C22H42O9P  | LPG (16:1) | 481.2566 | 481.2569 | 0.5236  |
| C22H44O9P  | LPG (16:0) | 483.2723 | 483.2733 | 2.0734  |
| C24H46O9P  | LPG (18:1) | 509.2879 | 509.2887 | 1.4766  |
| C43H76O13P | PI (34:3)  | 831.5024 | 831.4984 | -4.8106 |
| C43H78O13P | PI (34:2)  | 833.5180 | 833.5175 | -0.5999 |
| C43H80O13P | PI (34:1)  | 835.5337 | 835.5339 | 0.2394  |
| C43H82O13P | PI (34:0)  | 837.5493 | 837.5491 | -0.2388 |
| C45H78O13P | PI (36:4)  | 857.5180 | 857.5196 | 1.8659  |
| C45H80O13P | PI (36:3)  | 859.5337 | 859.5352 | 1.7451  |
| C45H82O13P | PI (36:2)  | 861.5493 | 861.5505 | 1.3928  |
| C45H84O13P | PI (36:1)  | 863.5650 | 863.5674 | 2.7792  |
| C27H50O12P | LPI (18:1) | 597.3040 | 597.306  | 3.3601  |
| C37H69O8NP | PE (32:2)  | 686.4761 | 686.4758 | -0.4108 |
| C39H73NO8P | PE (34:2)  | 714.5074 | 714.5067 | -0.9545 |
| C39H75NO8P | PE (34:1)  | 716.5230 | 716.5227 | -0.4633 |

|            |             |           |          |         |
|------------|-------------|-----------|----------|---------|
| C43H73O8NP | PE (38:6)   | 762.51    | 762.5073 | 0.3934  |
| C43H75NO8P | PE (38:5)   | 764.5230  | 764.5232 | 0.2616  |
| C45H71O8NP | PE (40:9)   | 784.4917  | 784.4918 | 0.0867  |
| C45H73O8NP | PE (40:8)   | 786.5074  | 786.5076 | 0.2772  |
| C25H41NO7P | LPE (20:5)  | 498.2621  | 498.2613 | -1.5394 |
| C25H43NO7P | LPE (20:4)  | 500.2777  | 500.2779 | 0.3658  |
| C38H74O7N  | DGTS (28:0) | 656.5465  | 656.5468 | 0.4128  |
| C40H76O7N  | DGTS (30:1) | 682.5622  | 682.5628 | 0.9098  |
| C40H78O7N  | DGTS (30:0) | 684.5778  | 684.5787 | 1.2723  |
| C42H74O7N  | DGTS (32:4) | 704.5465  | 704.5458 | -1.0347 |
| C42H76O7N  | DGTS (32:3) | 706.5622  | 706.5617 | -0.6779 |
| C42H78O7N  | DGTS (32:2) | 708.5778  | 708.5778 | -0.0409 |
| C42H80O7N  | DGTS (32:1) | 710.5935  | 710.5933 | -0.2519 |
| C44H78O7N  | DGTS (34:4) | 732.5778  | 732.5774 | -0.5856 |
| C44H80O7N  | DGTS (34:3) | 734.5935  | 734.5932 | -0.3798 |
| C44H82O7N  | DGTS (34:2) | 736.6091  | 736.6083 | -1.1241 |
| C44H84O7N  | DGTS (34:1) | 738.6248  | 738.624  | -1.0547 |
| C46H84O7N  | DGTS (36:3) | 762.6248  | 762.6248 | 0.0275  |
| C46H86O7N  | DGTS (36:2) | 764.6404  | 764.6405 | 0.0929  |
| C24H48O6N  | MGTS 14:0   | 446.34816 | 446.347  | -2.6078 |
| C26H50O6N  | MGTS 16:1   | 472.36381 | 472.3632 | -1.2998 |
| C26H52O6N  | MGTS 16:0   | 474.3795  | 474.3792 | -0.5565 |
| C28H48O6N  | MGTS 18:4   | 494.3482  | 494.3477 | -0.9386 |
| C28H50O6N  | MGTS 18:3   | 496.3638  | 496.3634 | -0.8341 |
| C28H52O6N  | MGTS 18:2   | 498.3795  | 498.3796 | 0.2729  |
| C28H54O6N  | MGTS 18:1   | 500.3951  | 500.3943 | -1.6267 |
| C38H74O7N  | DGTA (28:0) | 656.5465  | 656.547  | 0.7174  |
| C40H74O7N  | DGTA (30:2) | 680.5465  | 680.5433 | -4.702  |
| C40H76O7N  | DGTA (30:1) | 682.5622  | 682.5623 | 0.1773  |
| C40H78O7N  | DGTA (30:0) | 684.5778  | 684.5782 | 0.5419  |
| C42H74O7N  | DGTA (32:4) | 704.5465  | 704.5464 | -0.1831 |
| C42H76O7N  | DGTA (32:3) | 706.5622  | 706.5625 | 0.4543  |
| C42H78O7N  | DGTA (32:2) | 708.5778  | 708.5778 | -0.0409 |
| C42H80O7N  | DGTA (32:1) | 710.5935  | 710.5933 | -0.2519 |
| C44H78O7N  | DGTA (34:4) | 732.5778  | 732.5776 | -0.3126 |
| C44H80O7N  | DGTA (34:3) | 734.5935  | 734.5935 | 0.0286  |
| C44H82O7N  | DGTA (34:2) | 736.6091  | 736.6091 | -0.0380 |

|           |             |          |          |         |
|-----------|-------------|----------|----------|---------|
| C44H84O7N | DGTA (34:1) | 738.6248 | 738.6241 | -0.9193 |
| C46H80O7N | DGTA (36:5) | 758.5935 | 758.5925 | -1.3182 |
| C46H82O7N | DGTA (36:4) | 760.6091 | 760.6085 | -0.8257 |
| C46H84O7N | DGTA (36:3) | 762.6248 | 762.6246 | -0.2347 |
| C46H84O7N | DGTA (36:2) | 764.6404 | 764.6406 | 0.2616  |
| C48H82O7N | DGTA (38:6) | 784.6091 | 784.6084 | -0.8922 |
| C48H84O7N | DGTA (38:5) | 786.6248 | 786.6235 | -1.6526 |
|           |             |          |          |         |
| C24H48O6N | MGTA 14:0   | 446.3482 | 446.3464 | -3.9521 |
| C26H50O6N | MGTA 16:1   | 472.3638 | 472.3618 | -4.2637 |
| C26H52O6N | MGTA 16:0   | 474.3795 | 474.3777 | -3.7185 |
| C28H48O6N | MGTA 18:4   | 494.3482 | 494.3463 | -3.7706 |
| C28H50O6N | MGTA 18:3   | 496.3638 | 496.3623 | -3.0502 |
| C28H52O6N | MGTA 18:2   | 498.3795 | 498.3778 | -3.3388 |
| C28H54O6N | MGTA 18:1   | 500.3951 | 500.3941 | -2.0264 |
| C30H50O6N | MGTA 20:5   | 520.3638 | 520.3619 | -3.6513 |
| C30H52O6N | MGTA 20:4   | 522.3795 | 522.3779 | -2.9940 |
| C30H54O6N | MGTA 20:3   | 524.3951 | 524.3958 | 1.3082  |

Table S2. Mann–Whitney  $U$  nonparametric test for univariate analysis of polar lipid transformed data set.

|          | F.value | p.value  | FDR      |
|----------|---------|----------|----------|
| MGDGC321 | 0       | 0.002165 | 0.007322 |
| MGDGC344 | 6       | 0.064935 | 0.076087 |
| MGDGC343 | 5       | 0.041126 | 0.053162 |
| MGDGC342 | 21      | 0.699134 | 0.712579 |
| MGDGC341 | 4       | 0.025974 | 0.034999 |
| MGDGC368 | 36      | 0.002165 | 0.007322 |
| MGDGC367 | 36      | 0.004922 | 0.007641 |
| MGDGC366 | 30      | 0.064935 | 0.076087 |
| MGDGC365 | 15.5    | 0.747921 | 0.757449 |
| MGDGC364 | 7       | 0.092125 | 0.105381 |
| MGDGC389 | 34      | 0.008658 | 0.012866 |
| MGDGC388 | 30      | 0.064935 | 0.076087 |
| MGDGC387 | 0       | 0.004922 | 0.007641 |
| MGDGC386 | 0       | 0.004998 | 0.007641 |
| MGDGC385 | 0       | 0.002165 | 0.007322 |
| MGDGC384 | 7       | 0.093074 | 0.105705 |
| MGDGC409 | 8       | 0.132035 | 0.147842 |
| MGDGC408 | 0       | 0.002165 | 0.007322 |

|          |      |          |          |
|----------|------|----------|----------|
| DGDGC321 | 33   | 0.020022 | 0.027926 |
| DGDGC322 | 36   | 0.004998 | 0.007641 |
| DGDGC340 | 27.5 | 0.140194 | 0.15588  |
| DGDGC341 | 5    | 0.044576 | 0.057157 |
| DGDGC342 | 29   | 0.090412 | 0.10417  |
| DGDGC343 | 34   | 0.011369 | 0.016585 |
| DGDGC344 | 0    | 0.004922 | 0.007641 |
| DGDGC361 | 28   | 0.086332 | 0.100195 |
| DGDGC362 | 30   | 0.060856 | 0.076087 |
| DGDGC363 | 14.5 | 0.618402 | 0.634361 |
| DGDGC364 | 13.5 | 0.518159 | 0.537273 |
| DGDGC365 | 7.5  | 0.108074 | 0.121871 |
| DGDGC366 | 32   | 0.030348 | 0.040549 |
| DGDGC367 | 36   | 0.003601 | 0.007641 |
| DGDGC384 | 0    | 0.004337 | 0.007641 |
| DGDGC385 | 0    | 0.004772 | 0.007641 |
| DGDGC386 | 0    | 0.002165 | 0.007322 |
| DGDGC387 | 10   | 0.228133 | 0.245089 |
| DGDGC388 | 36   | 0.002165 | 0.007322 |
| DGDGC389 | 36   | 0.004998 | 0.007641 |
| PGC320   | 27   | 0.172733 | 0.186833 |
| PGC321   | 0    | 0.002165 | 0.007322 |
| PGC322   | 0    | 0.004998 | 0.007641 |
| PGC340   | 4    | 0.025974 | 0.034999 |
| PGC341   | 0    | 0.002165 | 0.007322 |
| PGC342   | 13.5 | 0.520377 | 0.537273 |
| PGC343   | 36   | 0.002165 | 0.007322 |
| PGC344   | 36   | 0.002165 | 0.007322 |
| PGC362   | 0    | 0.002165 | 0.007322 |
| PGC363   | 20   | 0.818182 | 0.82336  |
| PGC364   | 0    | 0.002165 | 0.007322 |
| LPGC160  | 0    | 0.004998 | 0.007641 |
| LPGC161  | 36   | 0.002165 | 0.007322 |
| LPGC181  | 12   | 0.393939 | 0.41481  |
| SQDGC280 | 0    | 0.004998 | 0.007641 |
| SQDGC300 | 0    | 0.004922 | 0.007641 |
| SQDGC301 | 35.5 | 0.0063   | 0.00954  |
| SQDGC320 | 0    | 0.004772 | 0.007641 |
| SQDGC321 | 36   | 0.004998 | 0.007641 |
| SQDGC322 | 36   | 0.002165 | 0.007322 |
| SQDGC323 | 36   | 0.002165 | 0.007322 |
| SQDGC340 | 30   | 0.064935 | 0.076087 |

|          |     |          |          |
|----------|-----|----------|----------|
| SQDGC341 | 36  | 0.004922 | 0.007641 |
| SQDGC342 | 36  | 0.004922 | 0.007641 |
| SQDGC343 | 36  | 0.004922 | 0.007641 |
| SQDGC344 | 9   | 0.168947 | 0.185259 |
| SQDGC364 | 2.5 | 0.015937 | 0.022424 |
| SQDGC365 | 3.5 | 0.024722 | 0.03418  |
| SQMGC140 | 3   | 0.015152 | 0.02151  |
| SQMGC160 | 0   | 0.002165 | 0.007322 |
| SQMGC161 | 3   | 0.015152 | 0.02151  |
| SQMGC181 | 36  | 0.002165 | 0.007322 |
| SQMGC182 | 1   | 0.004329 | 0.007641 |
| SQMGC183 | 36  | 0.004922 | 0.007641 |
| DGTAC280 | 0   | 0.002165 | 0.007322 |
| DGTAC300 | 0   | 0.004922 | 0.007641 |
| DGTAC301 | 36  | 0.004772 | 0.007641 |
| DGTAC302 | 36  | 0.002165 | 0.007322 |
| DGTAC321 | 0   | 0.004922 | 0.007641 |
| DGTAC322 | 36  | 0.004998 | 0.007641 |
| DGTAC323 | 36  | 0.002165 | 0.007322 |
| DGTAC324 | 36  | 0.002165 | 0.007322 |
| DGTAC341 | 0   | 0.004998 | 0.007641 |
| DGTAC342 | 36  | 0.004624 | 0.007641 |
| DGTAC343 | 36  | 0.004998 | 0.007641 |
| DGTAC344 | 36  | 0.004998 | 0.007641 |
| DGTAC362 | 1.5 | 0.010007 | 0.014732 |
| DGTAC363 | 36  | 0.004998 | 0.007641 |
| DGTAC364 | 36  | 0.002165 | 0.007322 |
| DGTAC365 | 30  | 0.065081 | 0.076087 |
| DGTAC385 | 5   | 0.041126 | 0.053162 |
| DGTAC386 | 5   | 0.041126 | 0.053162 |
| PIC340   | 36  | 0.002165 | 0.007322 |
| PIC341   | 0   | 0.002165 | 0.007322 |
| PIC342   | 0   | 0.002165 | 0.007322 |
| PIC343   | 35  | 0.004329 | 0.007641 |
| PIC361   | 36  | 0.004998 | 0.007641 |
| PIC362   | 35  | 0.004329 | 0.007641 |
| PIC363   | 36  | 0.002165 | 0.007322 |
| PIC364   | 36  | 0.002165 | 0.007322 |
| PEC322   | 0   | 0.002165 | 0.007322 |
| PEC342   | 0   | 0.002165 | 0.007322 |
| PEC341   | 9   | 0.158147 | 0.174621 |
| PEC386   | 36  | 0.004772 | 0.007641 |

|          |    |          |          |
|----------|----|----------|----------|
| PEC385   | 35 | 0.004329 | 0.007641 |
| PEC409   | 36 | 0.004772 | 0.007641 |
| PEC408   | 36 | 0.004998 | 0.007641 |
| LPEC204  | 0  | 0.002165 | 0.007322 |
| LPEC205  | 36 | 0.002165 | 0.007322 |
| DGMGC160 | 0  | 0.004998 | 0.007641 |
| DGMGC181 | 0  | 0.002165 | 0.007322 |
| DGMGC182 | 0  | 0.004847 | 0.007641 |
| DGMGC183 | 36 | 0.004922 | 0.007641 |
| DGMGC184 | 36 | 0.004998 | 0.007641 |
| MGMGC181 | 2  | 0.012907 | 0.018656 |
| MGMGC182 | 11 | 0.292834 | 0.312487 |
| MGMGC183 | 36 | 0.004998 | 0.007641 |
| MGMGC184 | 6  | 0.064935 | 0.076087 |
| DGTSC280 | 30 | 0.064935 | 0.076087 |
| DGTSC300 | 1  | 0.008127 | 0.012191 |
| DGTSC301 | 0  | 0.002165 | 0.007322 |
| DGTSC321 | 0  | 0.004998 | 0.007641 |
| DGTSC322 | 36 | 0.002165 | 0.007322 |
| DGTSC323 | 36 | 0.002165 | 0.007322 |
| DGTSC324 | 36 | 0.002165 | 0.007322 |
| DGTSC341 | 36 | 0.004772 | 0.007641 |
| DGTSC342 | 36 | 0.002165 | 0.007322 |
| DGTSC343 | 30 | 0.065081 | 0.076087 |
| DGTSC344 | 23 | 0.484848 | 0.507177 |
| DGTSC362 | 0  | 0.002165 | 0.007322 |
| DGTSC363 | 5  | 0.041126 | 0.053162 |
| MGTSC140 | 36 | 0.002165 | 0.007322 |
| MGTSC160 | 36 | 0.002165 | 0.007322 |
| MGTSC161 | 0  | 0.002165 | 0.007322 |
| MGTSC181 | 35 | 0.004329 | 0.007641 |
| MGTSC182 | 36 | 0.002165 | 0.007322 |
| MGTSC183 | 36 | 0.002165 | 0.007322 |
| MGTSC184 | 30 | 0.064935 | 0.076087 |
| MGTAC140 | 18 | 1        | 1        |
| MGTAC160 | 36 | 0.002165 | 0.007322 |
| MGTAC161 | 9  | 0.171979 | 0.186833 |
| MGTAC181 | 0  | 0.004922 | 0.007641 |
| MGTAC182 | 0  | 0.004998 | 0.007641 |
| MGTAC183 | 36 | 0.002165 | 0.007322 |
| MGTAC184 | 0  | 0.004998 | 0.007641 |
| MGTAC203 | 36 | 0.002165 | 0.007322 |

|          |    |          |          |
|----------|----|----------|----------|
| MGTAC204 | 36 | 0.004998 | 0.007641 |
| MGTAC205 | 30 | 0.065081 | 0.076087 |
| PCC322   | 36 | 0.004847 | 0.007641 |
| PCC341   | 30 | 0.06461  | 0.076087 |
| PCC342   | 0  | 0.004998 | 0.007641 |
| PCC343   | 36 | 0.004847 | 0.007641 |
| PCC362   | 0  | 0.004922 | 0.007641 |
| PCC363   | 36 | 0.004698 | 0.007641 |
| PCC365   | 36 | 0.004624 | 0.007641 |
| PCC385   | 36 | 0.004772 | 0.007641 |
| PCC386   | 36 | 0.004624 | 0.007641 |
| PCC387   | 36 | 0.004847 | 0.007641 |
| LPCC160  | 24 | 0.393939 | 0.41481  |
| LPCC161  | 32 | 0.025974 | 0.034999 |
| LPCC181  | 0  | 0.002165 | 0.007322 |
